# Supplementary material for: A 3D conductive network with high loading Li2S@C for high performance lithium–sulfur batteries
Source: Royal Society of Chemistry journal article supplement (doi:10.1039/c7ta06090d), 2017-01-01
Supplement: c7ta06090d1.pdf [file c7ta06090d1.pdf]

## Supporting Information for

### **3D Conductive Network with High Loading Li<sub>2</sub>S@C for High Performance Lithium-Sulfur Batteries**

Dong-huang Wang <sup>[a]</sup>, Dong Xie <sup>[ab]</sup>, Xin-hui Xia <sup>\*[a]</sup>, Xu-qing Zhang <sup>[a]</sup>, Wang-jia

Tang <sup>[a]</sup>, Yu Zhong <sup>[a]</sup>, Jian-bo Wu<sup>[c]</sup>, Xiu-li Wang <sup>[a]</sup> and Jiang-ping Tu <sup>\*[a]</sup>

[a] State Key Laboratory of Silicon Materials, Key Laboratory of Advanced Materials and Applications for Batteries of Zhejiang Province, and School of Materials Science and Engineering, Zhejiang University, Hangzhou 310027, China

E-mail: [helloxxh@zju.edu.cn](mailto:helloxxh@zju.edu.cn), [tujp@zju.edu.cn](mailto:tujp@zju.edu.cn), [tujplab@zju.edu.cn](mailto:tujplab@zju.edu.cn)

[b] Guangdong Engineering and Technology Research Center for Advanced Nanomaterials, School of Environment and Civil Engineering, Dongguan University of Technology, Dongguan 523808, China.

[c] College of Physics & Electronic Engineering, Taizhou University, Taizhou 318000, China

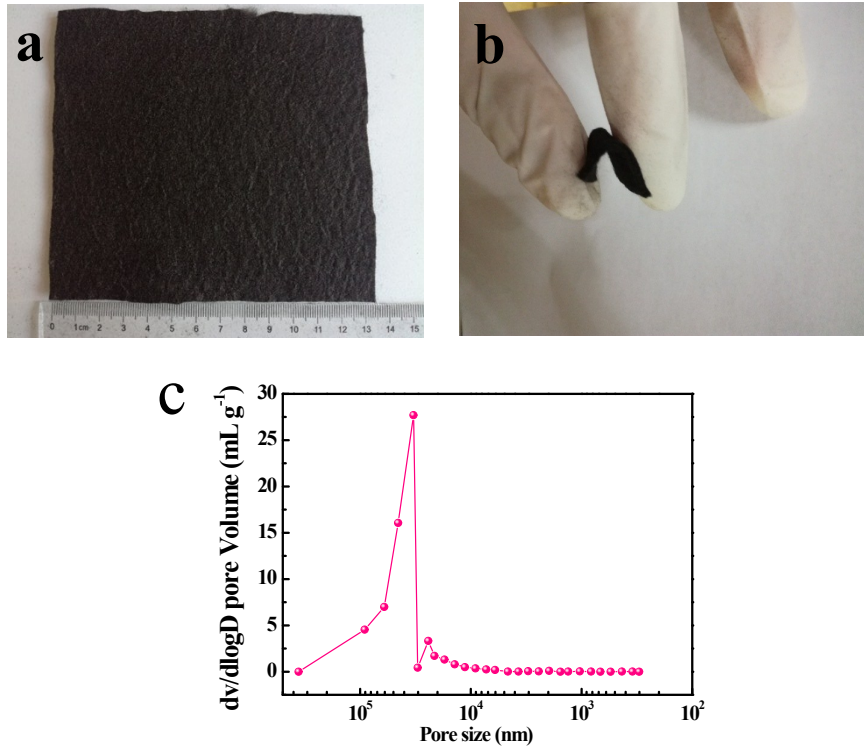

**Figure S1.** (a-b) Photograph of carbon felt, (c) MIP result of carbon felt.

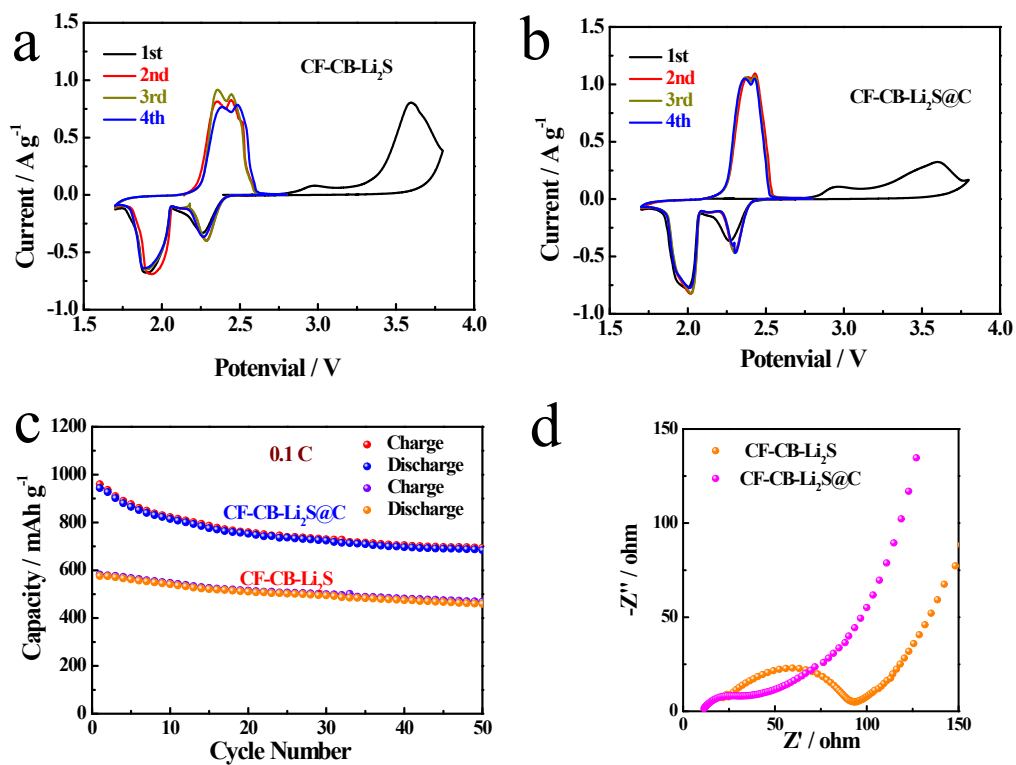

**Figure S2.** CV curves of (a) CF-CB-Li<sub>2</sub>S and (b) CF-CB-Li<sub>2</sub>S@C cathode at a scan rate of 0.1 mV s<sup>-1</sup>, (c) cycling performance at 0.1 C, (d) Nyquist plots after activation process.

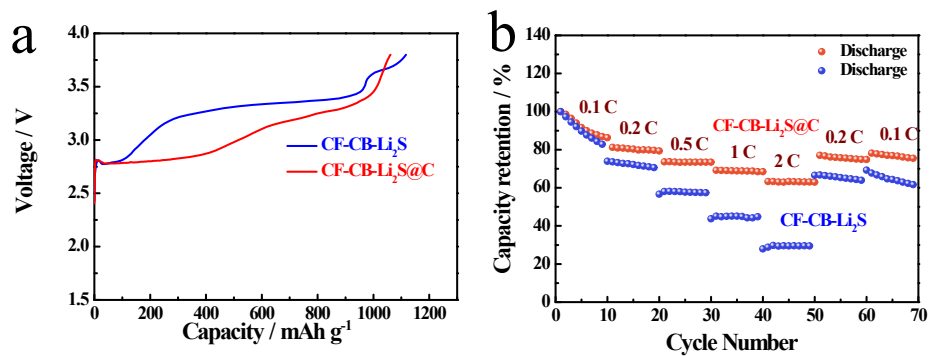

**Figure S3.** (a) The first charging voltage profiles of CF-CB-Li<sub>2</sub>S and CF-CB-Li<sub>2</sub>S@C cathodes, (b) capacity retention of CF-CB-Li<sub>2</sub>S and CF-CB-Li<sub>2</sub>S@C cathodes.

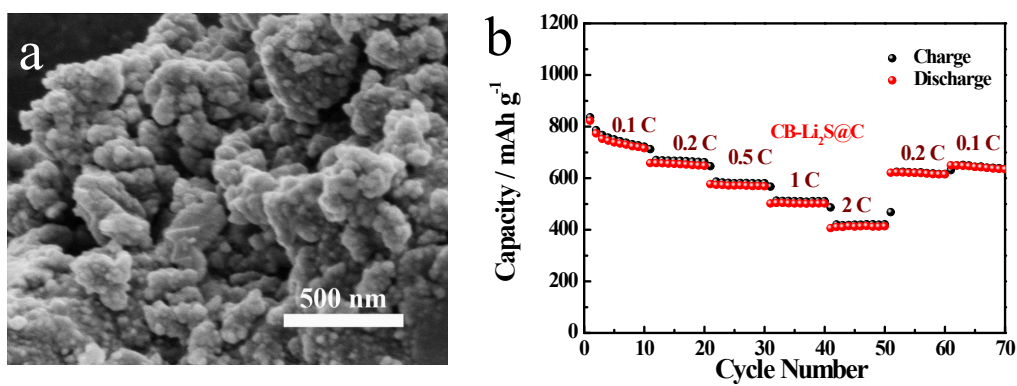

**Figure S4.** (a) A SEM image of CB-Li<sub>2</sub>S@C, and (b) rate performance of CB-Li<sub>2</sub>S@C at current rates ranging from 0.1 C to 2 C

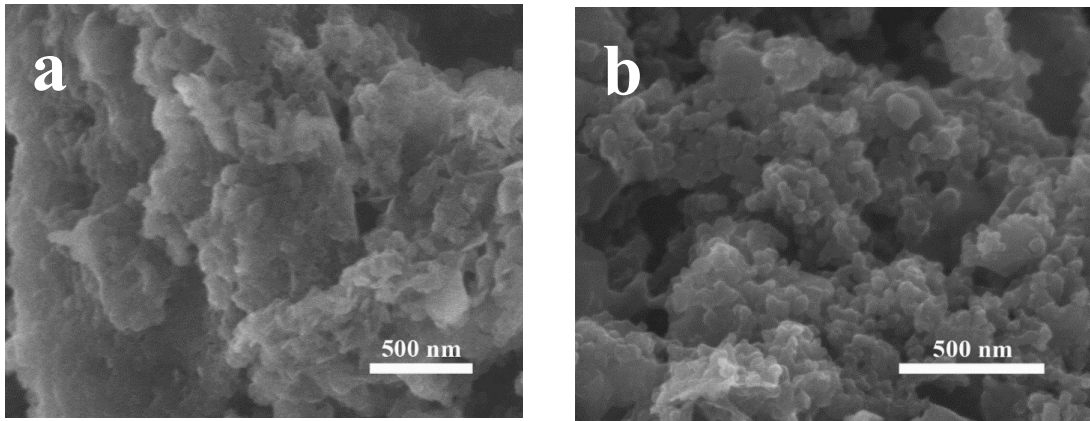

**Figure S5.** SEM images of (a) CF-CB-Li<sub>2</sub>S and (b) CF-CB-Li<sub>2</sub>S@C after 200 cycles at 1 C.
